# Supplementary material for: Intracellular uptake of macromolecules by brain lymphatic endothelial cells during zebrafish embryonic development
Source: eLife. 2017 May 12;6:e25932. doi: 10.7554/eLife.25932 (PMC5457137; doi:10.7554/eLife.25932)
Supplement: Figure 4—source data 1. — Following analysis embryos were genotyped for the presence of the ccbe1hu10965 allele and grouped accordingly. Results from two independent experiments were combined and represented as percentages. DOI: http://dx.doi.org/10.7554/eLife.25932.008 [file elife-25932-fig4-data1.xlsx]

## Sheet: Figure 4E
Figure 4E
Analysis of ccbe1hu10965; Tg(flt4:mCitrine); Tg(flt1enh:tdTomato) mutant embryos
Experiment 1
Head lymphatic structures scored by stereomicroscope and genotype determined PCR
clutch 1
		flt4:mCitrine+ ECs in head
ccbe1 genotype	# of embryos	present	absent		Normalized to %
+/+ (wildtype)	10	10	0		100	0
+/- (heterozygous)	20	17	3		85	15
-/- (mutant)	7	0	7		0	100
Experiment 2
Head lymphatic structures scored by stereomicroscope and genotype determined PCR
clutch 2 and clutch 3
		flt4:mCitrine+ ECs in head
ccbe1 genotype	# of embryos	present	absent		Normalized to %
+/+ (wildtype)	18	18	0		100	0
+/- (heterozygous)	26	26	0		100	0
-/- (mutant)	16	1	15		6.25	93.75
Combined analyses Clutch 1, 2 and 3
		flt4:mCitrine+ ECs in head
ccbe1 genotype	# of embryos	present	absent		Normalized to %
+/+ (wildtype)	28	28	0		100	0
+/- (heterozygous)	46	43	3		93.4783	6.52174
-/- (mutant)	23	1	22		4.34783	95.6522
