# Supplementary figures and images for: Intracellular uptake of macromolecules by brain lymphatic endothelial cells during zebrafish embryonic development
Source: eLife journal article supplement (doi:10.7554/elife.25932), 2017-05-12

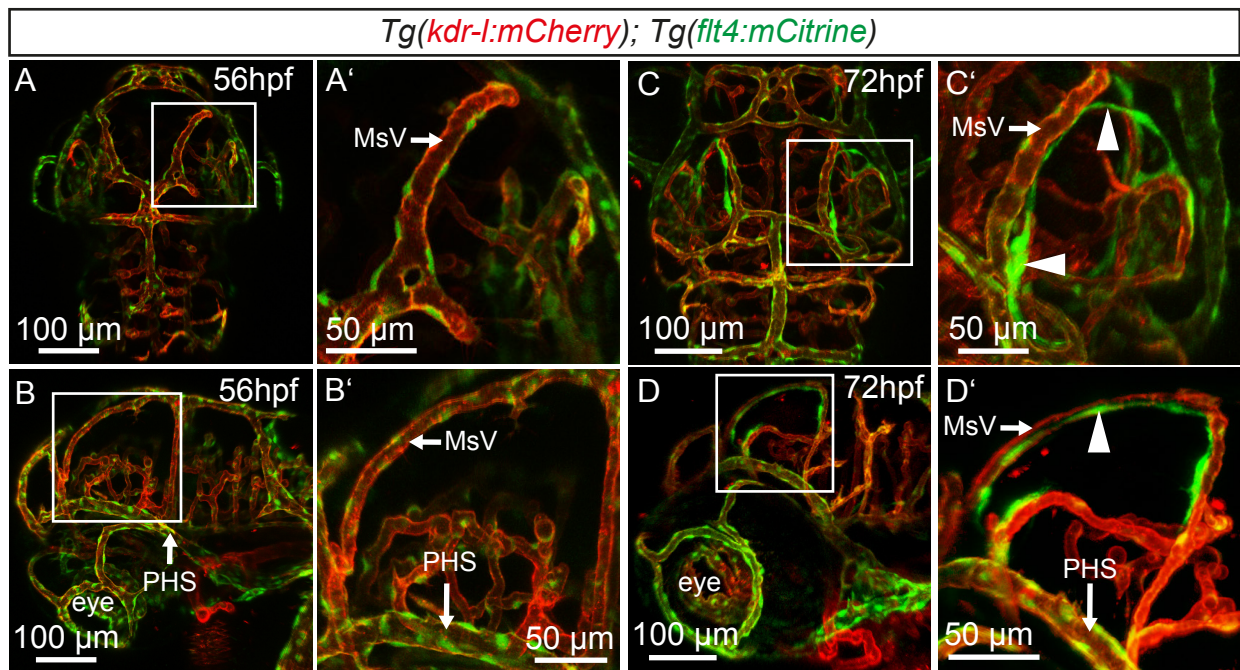

Figure 1 - figure supplement 1

Supplement: supp [file elife_poa_e25932_Figure_1_figure_supplement_1.pdf › elife_poa_e25932_Figure_1_figure_supplement_1.pdf]

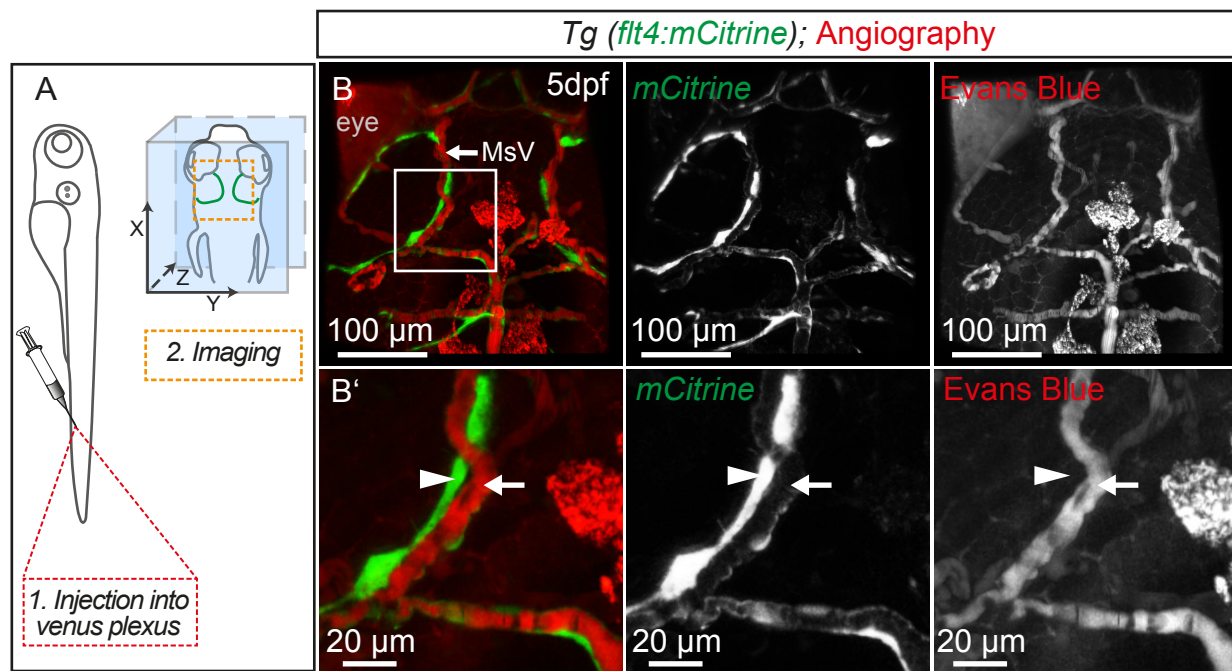

Figure 7 - figure supplement 1

Supplement: supp [file elife_poa_e25932_Figure_7_figure_supplement_1.pdf › elife_poa_e25932_Figure_7_figure_supplement_1.pdf]

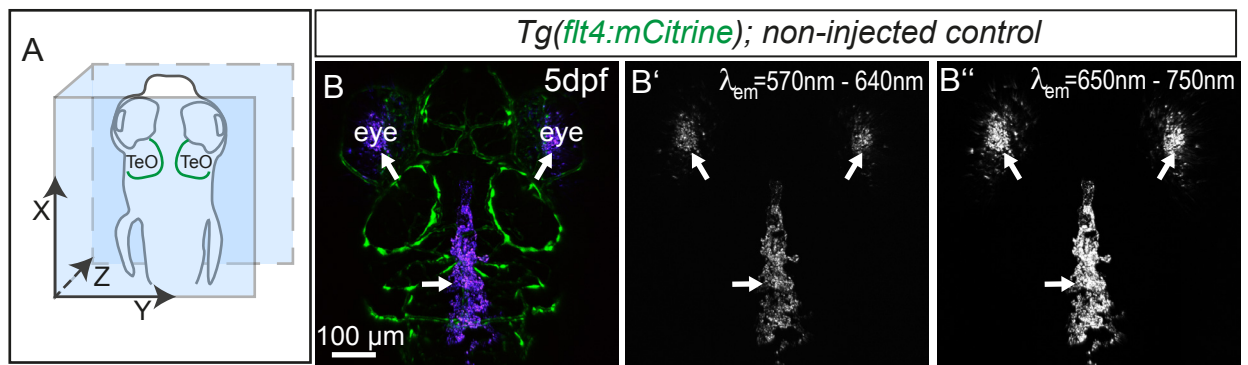

Figure 7 - figure supplement 2

Supplement: supp [file elife_poa_e25932_Figure_7_figure_supplement_2.pdf › elife_poa_e25932_Figure_7_figure_supplement_2.pdf]

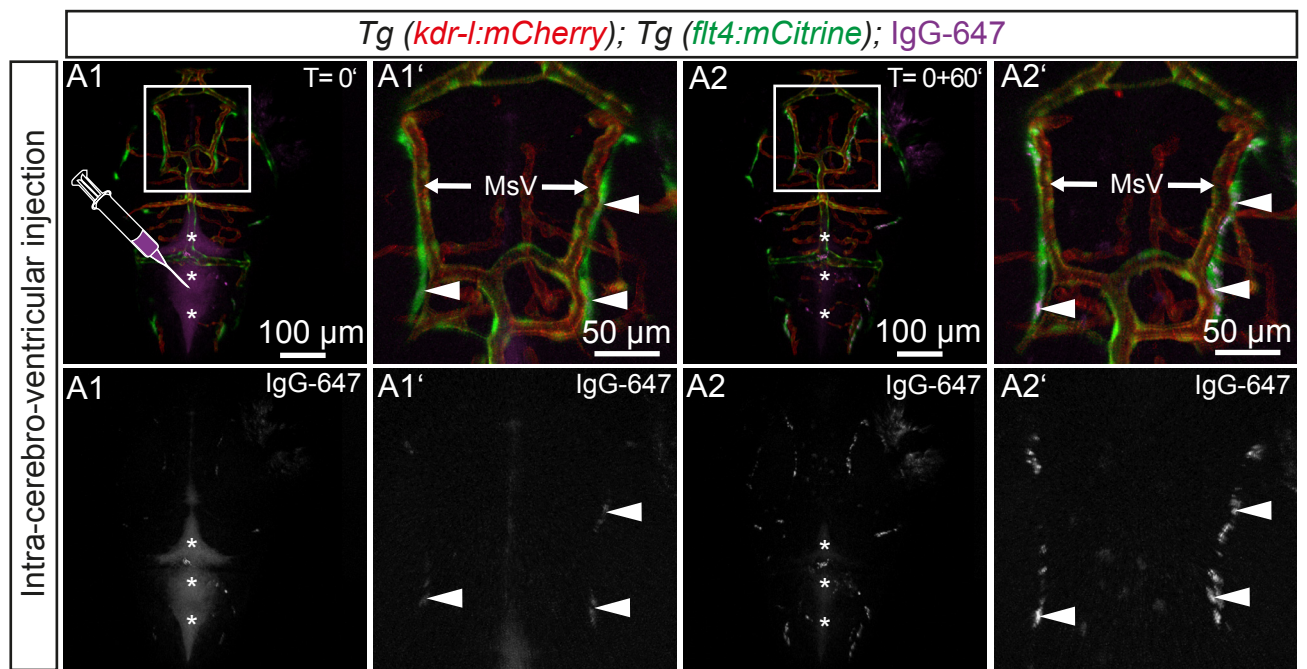

Figure 7 - figure supplement 3

Supplement: supp [file elife_poa_e25932_Figure_7_figure_supplement_3.pdf › elife_poa_e25932_Figure_7_figure_supplement_3.pdf]

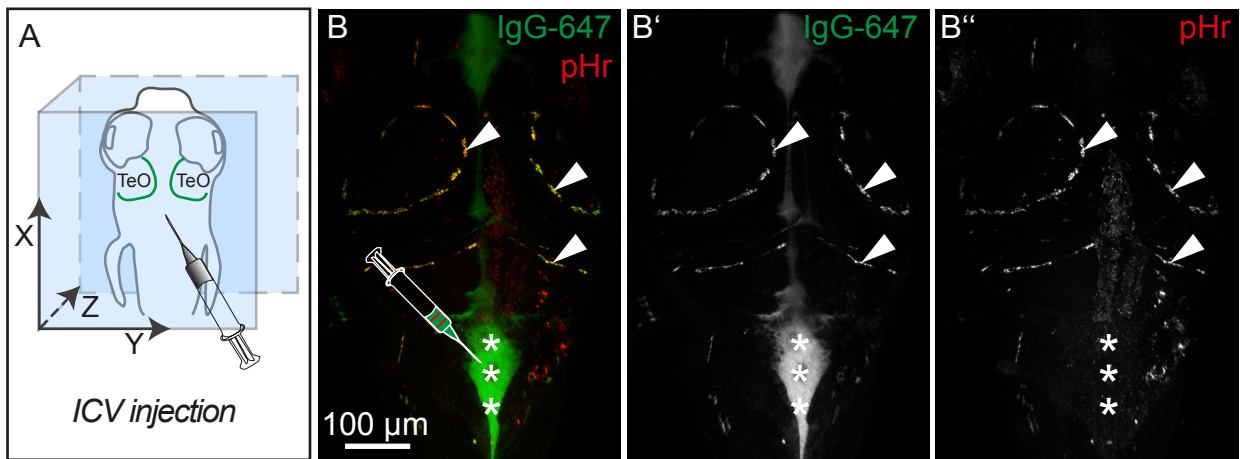

Figure 7 - figure supplement 4

Supplement: supp [file elife_poa_e25932_Figure_7_figure_supplement_4.pdf › elife_poa_e25932_Figure_7_figure_supplement_4.pdf]

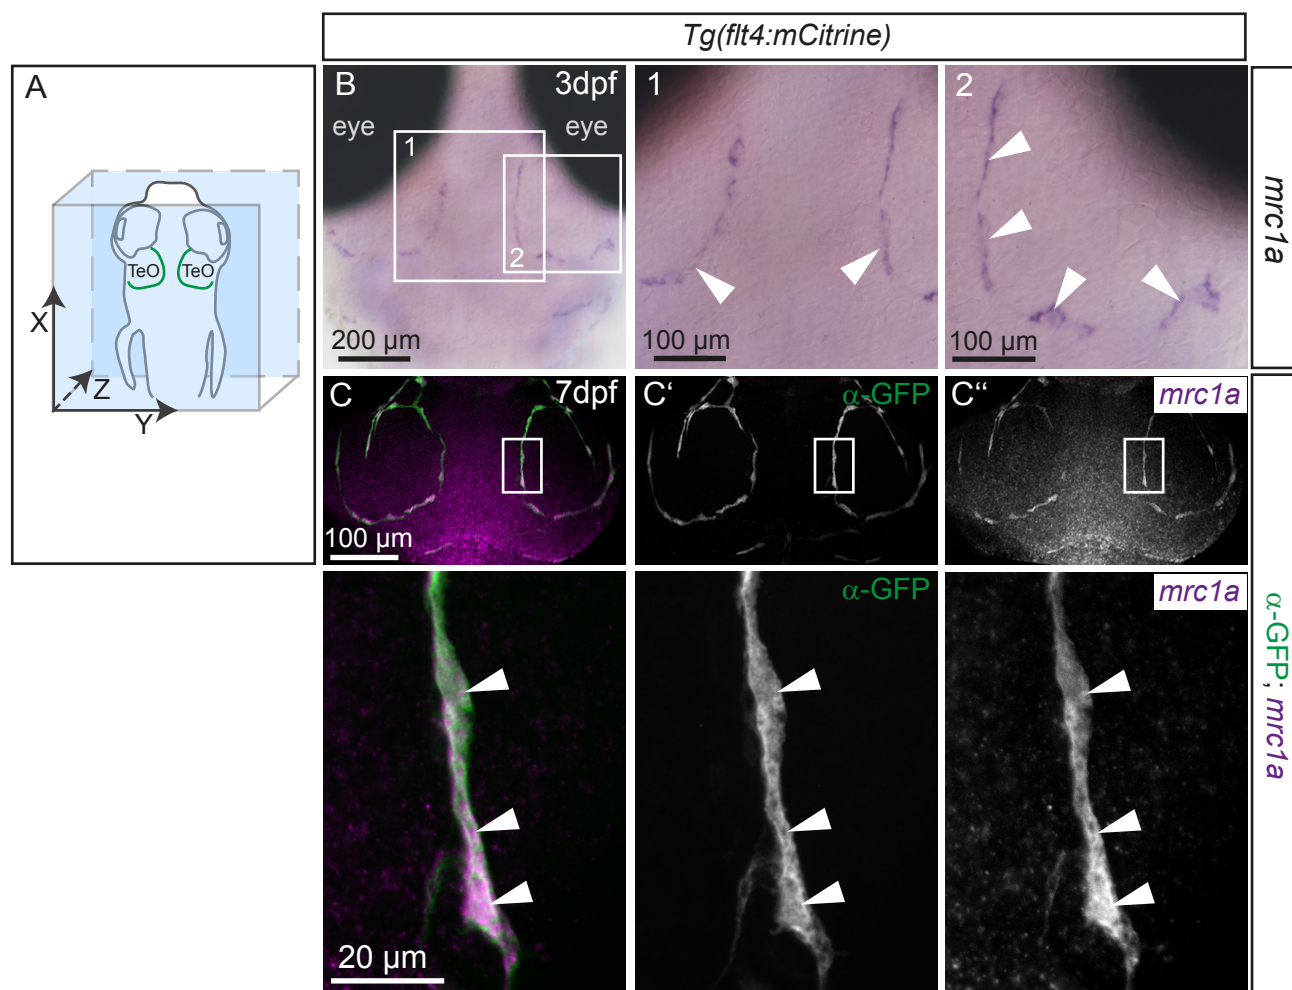

Figure 8 - figure supplement 1

Supplement: supp [file elife_poa_e25932_Figure_8_figure_supplement_1.pdf › elife_poa_e25932_Figure_8_figure_supplement_1.pdf]

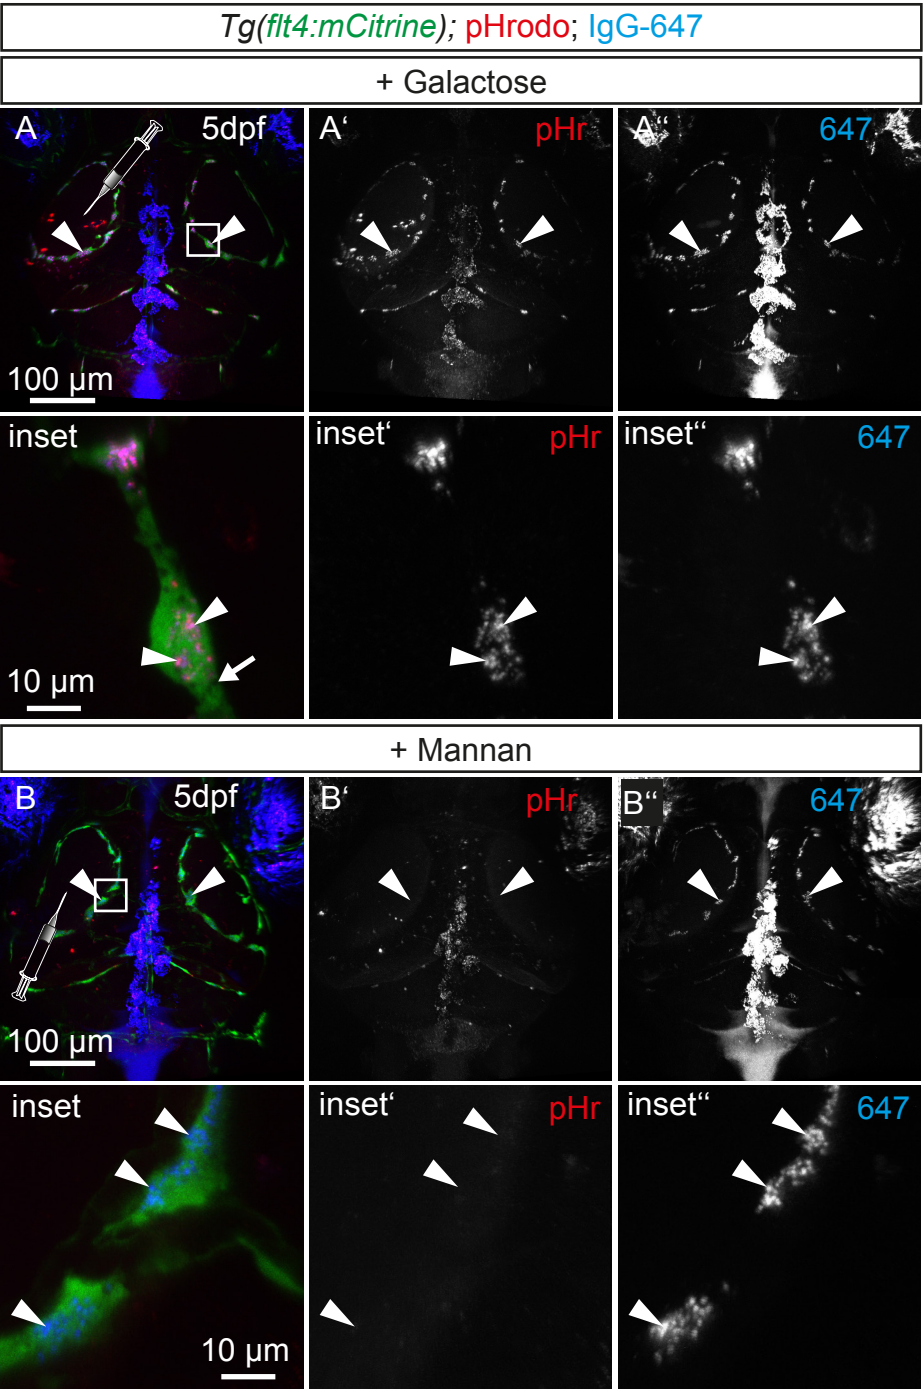

Figure 8 - figure supplement 2

Supplement: supp [file elife_poa_e25932_Figure_8_figure_supplement_2.pdf › elife_poa_e25932_Figure_8_figure_supplement_2.pdf]
